# Supplementary material for: Analysis of physiological and non-contact signals to evaluate the emotional component in consumer preferences
Source: PLoS One. 2022 May 13;17(5):e0267429. doi: 10.1371/journal.pone.0267429 (PMC9106218; doi:10.1371/journal.pone.0267429)
Supplement: S1 Data — (XLSX) [file pone.0267429.s001.xlsx]

## Sheet: Data
Subject	Step	Beverage	Preferred	Change of Preference	Consumer	SC	SCR	SCL	SS	std_SS	std_dSS	PNN50	RMSSD	LF freq peak	LF power	HF freq peak	HF power	EI	IBI	std_IBI
sbj_01	B	CC	1		0	0.14685	0.870764	0.113021	-0.00730999	0.0559477	-0.17241	0.0285714	-0.178652					-0.990078
sbj_01	B	CL			0	-0.0208109	-0.291706	-0.00815762	0.00375317	-0.0794507	-0.0846846	0.770492	-0.0857423	-0.427966	-0.236598	-0.397661	-0.629878	0.069474	-0.0107683	0.0543469
sbj_01	NB	CC			0	0.0804637	0.72785	0.0535471	-0.0168118	0.235949	0.00253993	-0.105556	-0.0019951	0.62963	1.27918	0.350309	-0.733826	-0.87727	0.113066	1.39316
sbj_01	NB	CL	1	CC->CL	0	0.222016	0.701497	0.202235	-0.0445793	-0.111442	-0.0119116	-0.0852273	-0.0166651	1.01235	-0.522569	-0.108025	-0.744592	-0.911633	-0.0383252	1.0297
sbj_02	B	CL			0	0.0130632	0.298199	0.00719778	-9.91444e-05	-0.0521998	0.286982		0.281474	1.55556	-0.397853	0.630108	-0.130342	-0.987486	-0.0598328	1.0596
sbj_02	B	CC			0	0.0921581		-0.014829	-0.0324888	0.206822	0.512512		0.510233	0.324786	1.16227	0.587097	0.814969	-0.449549	-0.0874664	1.41405
sbj_02	NB	CC			0	-0.202383		-0.205222	-0.0363892	-0.23263	-0.00802364	0.890244	-0.0123288	0.149826	-0.578257	0.502915	-0.370036	-0.0689452	0.166325	-0.395025
sbj_02	NB	CL			0		-0.181139		-0.020498	-0.0225056	0.23175	1.33962	0.229859	-0.61324	0.0318697	-0.266764	0.0796665	-0.0215617	0.0382138	-0.101229
sbj_03	B	CC	1		1	0.0599418	-0.299398	0.0694826	-0.023735	-0.0438568	0.16202	0.487805	0.157249					-0.915563	-0.0579663	-0.453904
sbj_03	B	CL			1	-0.124445	-0.53389	-0.113572	0.000962825	-0.163077	-0.144601	-0.431235	-0.148437					0.0021461	-0.182084	-0.222445
sbj_03	NB	CL			1	-0.0961288	0.0116396	-0.0983368	-0.0258963	-0.120471	0.304918	0.265306	0.301861	1.4557	-0.307056	-0.0279232	-0.79745	-0.0180257
sbj_03	NB	CC	1		1	-0.106791	0.323781	-0.11558	-0.0516344	-0.0571682	0.515732	1.34454	0.510133
sbj_04	B	CL			1	0.0370018	-0.353473	0.0709029	0.0114746	-0.0890332	-0.106372	-0.064	-0.110545						0.089679	0.458087
sbj_04	B	CC	1		1	-0.00307267	0.032613	-0.00617219	0.0377941	0.0876135	0.035871	0.397015	0.0333842					0.315548	0.131655	0.694711
sbj_04	NB	CL			1	0.0966252	-0.0669104	0.10864	-0.0263431	-0.00906548	0.0633883	0.257862	0.0602767			-0.353698	1.05104		-0.108717	1.07608
sbj_04	NB	CC	1		1	-0.00201349	-0.463839	0.031876	-0.0353109	-0.0957484	-0.120715	-0.227053	-0.1213	-0.451807	-0.364795	-0.217042	-0.307876	-0.934653	0.0903707
sbj_05	B	CC	1		0				-0.0267314	0.0130545	-0.0360753	0.606061	-0.0418327						-0.283075	-0.838099
sbj_05	B	CL			0				-0.0111764	-0.0527424	0.236703	0.57037	0.2352	-0.0973451	0.227172	0.35262	0.607515		-0.237456	-0.763123
sbj_05	NB	CL			0
sbj_05	NB	CC	1		0
sbj_06	B	CL			0
sbj_06	B	CC	1		0
sbj_06	NB	CC	1		0				-0.0246497	-0.287014	0.781327	0.827586	0.767083						-0.0777931	0.653274
sbj_06	NB	CL			0				-0.0500823	-0.353825	0.618103	0.232558	0.615448	1.90833	-0.713568	0.170243			0.0389762	0.391353
sbj_07	B	CC			0	0.00670206	0.156823	0.000107169	-0.00992299	0.175209	-0.059815	0.879245	-0.0632023	0.813793		-0.116216		-0.512862	0.0182867	0.322092
sbj_07	B	CL	1		0	-0.112988	-0.527804	-0.0947884	-0.0115509	0.257296	-0.0227431	0.57027	-0.023185	1.13793	3.05777	-0.397297	0.821489	-0.0103585	-0.0166626	0.255671
sbj_07	NB	CL			0	0.0667358		0.0237752	-0.0354641	0.0932659	-0.346259	-0.674897	-0.346302	0.116838	0.200287	-0.532979	-0.864683	-0.791865	-0.0694763	-0.158974
sbj_07	NB	CC	1	CL->CC	0	-0.0271999	1.4962	-0.0488433	-0.0068905	-0.00854782	-0.105521	0.0480929	-0.10617			-0.0478723	-0.466568	-0.0230299	-0.0695954	0.0993721
sbj_08	B	CL			0	0.221412	0.620786	0.199188	0.00476258	0.168218	0.0166493	-0.272727	0.0126638	-0.00581395	0.073364	-0.27027	-0.53815		0.0206251	1.29256
sbj_08	B	CC	1		0	0.204983	0.207881	0.204772	0.0423429	0.273607	0.148618	0.103448	0.147548	-0.517442	0.228567	0.611111	-0.327565		-0.0513512	-0.274687
sbj_08	NB	CL	1	CC->CL	0	0.106326	1.00266	0.0807571	0.0140652	0.161518	-0.494136	-0.784127	-0.49329	-0.0545455	-0.8521	-0.191529	-0.883836		0.0840841	0.767861
sbj_08	NB	CC			0	-0.0656374	-0.468164	-0.0540736	-0.0138958	0.0388235	-0.0444212	-0.062069	-0.0449622	-0.0909091	-0.111383	0.0607735	-0.12366	-0.036047	0.0989879	1.52421
sbj_09	B	CL	1		0	-0.171134	-0.675475	-0.137173	-0.0432257	-0.0497957	-0.1967	-0.682609	-0.200133	0.222628	2.32332	0.229709	-0.302693	-0.0881988		0.775206
sbj_09	B	CC			0	-0.235998	-0.76838	-0.200149	-0.0471861	-0.0681346	-0.204958	-0.41129	-0.205855	-0.00364964	0.777306	0.173047	-0.588483	-0.0667327		0.544312
sbj_09	NB	CC	1	CL->CC	0	-0.153673	-0.328457	-0.150136
sbj_09	NB	CL			0	-0.153591	0.138992	-0.159502
sbj_10	B	CC			0	0.00613396	-0.117384	0.00828629	-0.0306009	-0.0993494	-0.0312055	-0.0538462	-0.0329738	0.902439	-0.184904	0.0941512	-0.211121	-0.721123	-0.0439739	-0.379586
sbj_10	B	CL	1		0	-0.0885072	-0.388165	-0.0832056	-0.00450643	0.239537	0.285723	0.901449	0.285056	0.463415	0.385625	0.0299572	-0.0167864	-0.00560203	-0.139769	-0.319647
sbj_10	NB	CL			0	-0.0022765		-0.0108035	-0.0077755	-0.0492211	-0.223368	-0.609375	-0.226383					-0.0457657	0.0156559	0.464505
sbj_10	NB	CC	1	CL->CC	0	-0.0568645		-0.0715276	-0.00792624	-0.10654	-0.268735	-0.783654	-0.269468					-0.00709423	-0.00655311	1.59411
sbj_11	B	CL	1		1	0.00742944	-0.405842	0.0424576	-0.000677887	0.14252	0.175797	0.0135135	0.169745					-0.997595	-0.0570908	0.0731744
sbj_11	B	CC			1	-0.110871	-0.829629	-0.0499721	0.0168277	-0.0252314	-0.296761	-0.705882	-0.298078	-0.548926	-0.369057	0.285479	-0.255479	0.0503082	-0.149783	0.168571
sbj_11	NB	CC	1	CL->CC	1	0.0378984	0.252078	0.0323902	0.00411916	-0.143853	0.132184	0.280488	0.126652	-0.146132	-0.346285	-0.109375	-0.53056		0.037587	0.182808
sbj_11	NB	CL			1	-0.0126044	0.510924	-0.0262285	-0.0117578	-0.222705	-0.0710529	-0.236364	-0.0728393	-0.252149	0.100978	-0.00625	-0.814852	-0.0247397	-0.0861141	-0.489644
sbj_12	B	CC			0	0.0100114	0.37071	0.00493881	-0.0447433	-0.409304	-0.550856	-0.487805	-0.552852	1.21429	-0.537407	0.0772358	-0.909399	-0.621968	-0.328908	1.28103
sbj_12	B	CL	1		0	-0.147878	0.382927	-0.155393	0.021626	-0.303754	-0.499063	-0.603774	-0.499927	1.42857	0.441377	0.115854	-0.543371	0.0121247	0.0627977	0.16967
sbj_12	NB	CL	1		0	0.0125806	1.38371	-0.00702755	0.0011243	0.0925939	0.346625	0.108696	0.342124	0.521008	2.30089			0.0469968	0.242888	0.0376872
sbj_12	NB	CC			0	0.125235		0.0722602	-0.00821019	-0.111874	-0.185668	-1	-0.183234	0.0462185	0.90287	-0.244624	0.192083	-0.966503	0.1383	-0.491008
sbj_13	B	CC			0	-0.00856347	0.131847	-0.0110758	-0.0348999	0.0174503	0.0873662	-0.221154	0.0891312	0.922078	1.35001	0.716632	-0.104769	-0.283335	-0.226279	-0.659882
sbj_13	B	CL	1		0	-0.0527123	-0.607815	-0.0429016	0.00921388	0.130643	0.0485813	-0.106618	0.0487359	1.20779	1.31415	0.00616016	0.107787	0.0267291	-0.315457	-0.455616
sbj_13	NB	CC	1	CL->CC	0	-0.00494526	-0.256957	-0.000891812
sbj_13	NB	CL			0	-0.0272505	-0.32936	-0.0223981
sbj_14	B	CL			0				-0.00171961	-0.0862538	0.0173274	-0.421875	0.0132141			-0.155556	-0.700804		0.260657	0.371298
sbj_14	B	CC	1		0				-0.0158977		-0.382641	-0.853175	-0.383533			-0.316049	-0.655688		-0.0676056	-0.309868
sbj_14	NB	CL	1	CC->CL	0				0.0298882	-0.260755	-0.187981	-0.550152	-0.191198	-0.353933	0.141461		-0.52264		-0.029096	-0.0787531
sbj_14	NB	CC			0				-0.00410113	-0.212428	-0.365096	-0.74424	-0.365661	0.719101	0.804542	0.572632	-0.562986		-0.0771186	0.325384
sbj_15	B	CL			0				0.0137051	-0.154818	0.0535855	-0.233333	0.049943	0.0160428	-0.805153	-0.371742	0.429249		-0.0773717	-0.195806
sbj_15	B	CC	1		0				0.00820098	-0.132895	-0.158016	-0.460938	-0.160777	0.0106952	-0.587039	-0.141289	-0.449611		-0.0507897	-0.239005
sbj_15	NB	CC			0				-0.0180493	-0.205851	-0.239851	-0.782609	-0.240183	0.412371	-0.741188	0.144869	-0.718641		-0.164375	-0.771654
sbj_15	NB	CL	1	CC->CL	0				0.0108974	0.159589	0.100743	0	0.0992158	2.42268	-0.00760751	0.0523139	-0.501506		-0.299656	-0.379167
sbj_16	B	CL			0	-0.078479	-0.595524	-0.0525619	0.00156531		-0.699753	-1	-0.695292					0.00180221	-0.013065	-0.283168
sbj_16	B	CC	1		0	-0.135437	-0.54272	-0.115032	0.0043557		0.377717	-0.265306	0.375862	-0.605016		-0.179971	0.492803		0.380106	0.374685
sbj_16	NB	CC			0	-0.0523946	-0.177541	-0.0503353
sbj_16	NB	CL	1	CC->CL	0	-0.110864	-0.0294515	-0.112199
sbj_17	B	CL			0
sbj_17	B	CC	1		0
sbj_17	NB	CC	1		0														0.142246	-0.300816
sbj_17	NB	CL			0														0.174768	0.678029
sbj_18	B	CC			1	0.0661672	-0.672702	0.140748												0.943722
sbj_18	B	CL	1		1	-0.240406	-0.835359	-0.180299												-0.163946
sbj_18	NB	CL	1		1	0.114495	0.708546	0.0642171	0.00352625	-0.43436	-0.261807	-0.664706	-0.26083
sbj_18	NB	CC			1	-0.103065	-0.861835	-0.038809	-0.00714111	-0.323618	-0.284201	-1	-0.286081	0.979167	-0.191599	0.0804388	-0.0387343	-0.0629873	0.20558	-0.341251
sbj_19	B	CC			1	-0.0826452	-0.573088	-0.0561144	0.0126556	-0.0374452		2.05		-0.651163		0.0310786		0.039247	-0.109009	-0.736179
sbj_19	B	CL	1		1	-0.276669	-0.974519	-0.238864	0.0510401	-0.227589	-0.0701447	0.12963	-0.0708406	0.395349	1.07376	0.583181		0.0372034	-0.055819	-0.379605
sbj_19	NB	CL			1	-0.108584		-0.111663	0.00338345	-0.0223365	-0.283136	-1	-0.280429	0.143443	-0.73346	-0.297203	-0.158355	0.0074439		-0.0441882
sbj_19	NB	CC	1	CL->CC	1	0.0118354		0.0093176	-0.0121773	-0.267738	-0.568032	-1	-0.568177	-0.540984	-0.670074	-0.413753	-0.225145	-0.748599		-0.172941
sbj_20	B	CL			0	-0.0747258	0.179149	-0.0779091											0.00794074	0.30379
sbj_20	B	CC	1		0	-0.153584	2.02093	-0.180126
sbj_21	B	CC	1		1	-0.128889	0.605854	-0.130615	0.0256192	0.0760271	-0.110229	-0.507937	-0.112948	0.266234	-0.819468	0.214286	-0.835497	0.102711	-0.137427	-0.300225
sbj_21	B	CL			1	-0.34063	-0.92204		0.0517595	0.209166	0.115778	0.878788	0.116719	-0.25974	-0.46433	0.494505	-0.63588	0.0809777	-0.0574902	-0.348954
sbj_21	NB	CL			1	-0.164307	1.21734	-0.165273	-0.0121084	0.0721909		1.88372		1.8156	-0.634386	-0.0559105		-0.0310466	0.0261576	0.436937
sbj_21	NB	CC	1		1		-0.809659		0.0146792			1.25455		0.390071	2.92984	0.198083	0.439916	0.0148649	0.134362	0.158617
sbj_22	B	CL			1	-0.0451183	-0.758024	-0.0242269	0.00214217	0.0316484	0.0019246	0.609756	-0.00130083	0.254237	-0.698478	0.238782	-0.891284	0.0192102	0.079806	-0.160492
sbj_22	B	CC	1		1	-0.209433	-0.806563	-0.191929	-0.0224538	-0.124119	0.227857	1.65179	0.227027	0.378531	-0.816469	-0.166667	0.35051	-0.025394	0.149912	0.276683
sbj_22	NB	CC	1		1	-0.0943515	0.38616	-0.0960711	-0.030248	0.418255	0.467361	1.11382	0.460789	1.14388	0.287239	0.294613	-0.14741	-0.0980895	-0.100276	1.22338
sbj_22	NB	CL			1	-0.264843	-0.388737	-0.264407	0.0133498	0.370381	-0.0328732	1.00617	-0.0312886	1.10791	0.632911	-0.210438	-0.223651	0.0162331	-0.0611853	0.265509
sbj_23	B	CL			0	0.0427095	-0.413347	0.0486303											0.0545349	1.62598
sbj_23	B	CC	1		0	0.0394826	-0.274812	0.0435688											0.191755	1.64475
sbj_23	NB	CC	1		0	-0.0285227	-0.572768	0.000678645											-0.016416	-0.342326
sbj_23	NB	CL			0	-0.000565695	-0.44524	0.023294											0.0288008	-0.0954945
sbj_24	B	CL			0				-0.00270254	0.101443	0.321367	0.590909	0.317335	-0.259124	-0.477749	0.0432852	0.521624		0.283133	-0.020897
sbj_24	B	CC	1		0				-0.0126552	0.434058	0.550473		0.548094	-0.0620438	1.01214	-0.0854606			0.190595	-0.283226
sbj_24	NB	CL			0				0.0193299	0.0165219	-0.0950968	-0.625	-0.0984454	-0.201183	0.00701826	0.166324	-0.474411		0.136576
sbj_24	NB	CC	1		0				0.0283249	0.213499	0.199654	0.487069	0.197968	0.887574	1.76437	0.131417	-0.0721393		0.163235
sbj_25	B	CC	1		1		0.305645		0.0113557	0.525389	0.281147	-0.181818	0.274658						0.0287068	0.196286
sbj_25	B	CL			1		0.159958		-0.000307334	0.14528	0.202375	-0.1	0.200169	-0.647215	0.267924	-0.0499287	-0.857222		-0.0267451	0.614866
sbj_25	NB	CL			1	0.178031	0.400135	0.172048
sbj_25	NB	CC	1		1	0.120589	-0.522382	0.138001
